# Supplementary material for: Low-Cost Nitric Oxide Sensors: Assessment of Temperature and Humidity Effects
Source: MDPI journal article supplement (doi:10.3390/s22229013), 2022-11-21
Supplement: s1 [file s1]

Supplementary Material

# Low-Cost Nitric Oxide Sensors: Assessment of Temperature and Humidity Effects

Steven Owen <sup>1,\*</sup>, Lachlan Yee <sup>2</sup> and Damien Maher <sup>2</sup>

<sup>1</sup> Illawarra Coatings, 19 Technology Drive, Appin, NSW 2560, Australia

<sup>2</sup> Faculty of Science and Engineering, Southern Cross University, Military Road, Lismore, NSW 2480, Australia

\* Correspondence: steven@illawarracoatings.com

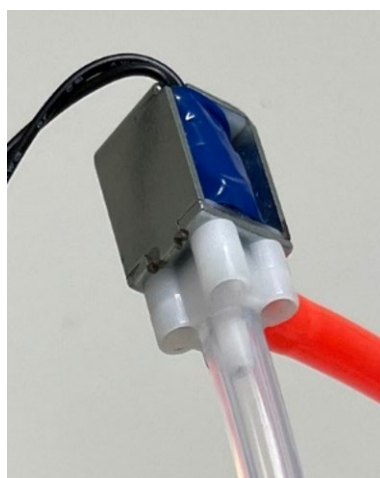

**Figure S1.** Two position, three way electrically controlled solenoid valve.

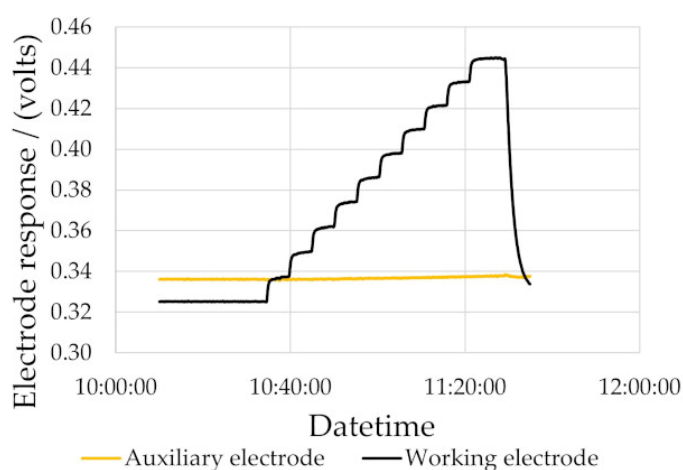

**Figure S2.** Typical electrode responses to 20 ppbV stepwise nitric oxide addition (chamber conditions 25 °C/50% relative humidity).

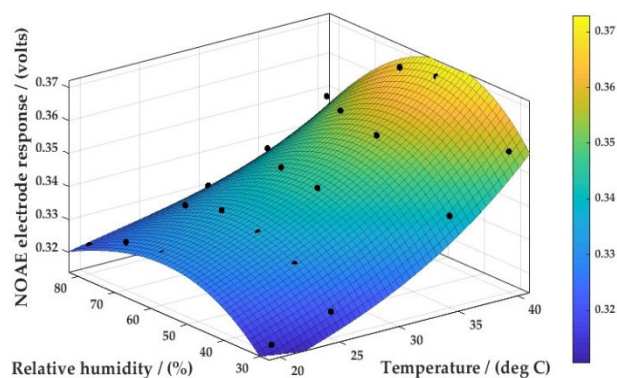

**Figure S3.** Nitric oxide auxiliary electrode surface function.

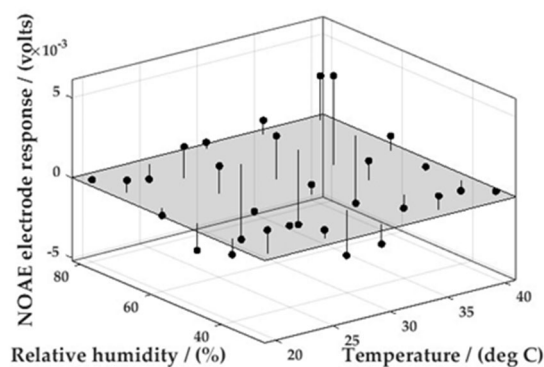

**Figure S4.** Nitric oxide auxiliary electrode residuals plot for Figure S4.

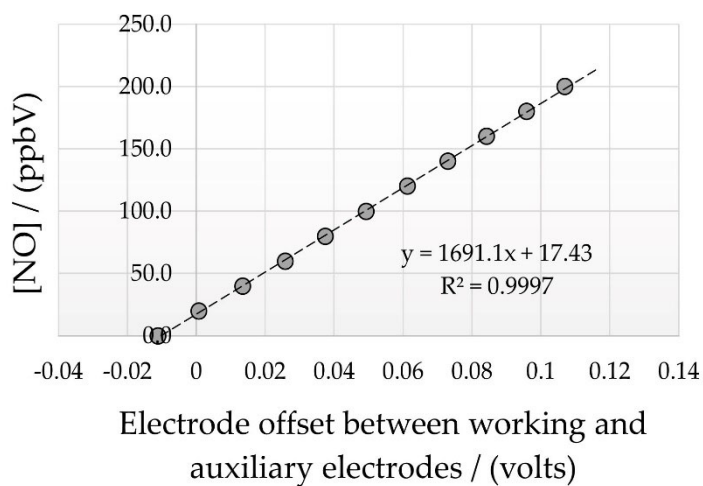

**Figure S5.** Typical calibration curve for 20 ppbV stepwise nitric oxide addition (chamber conditions 25 °C/50% relative humidity).

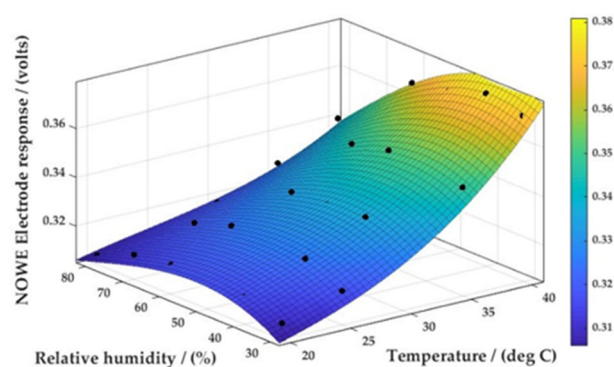

Figure S6. Nitric oxide working electrode surface function.

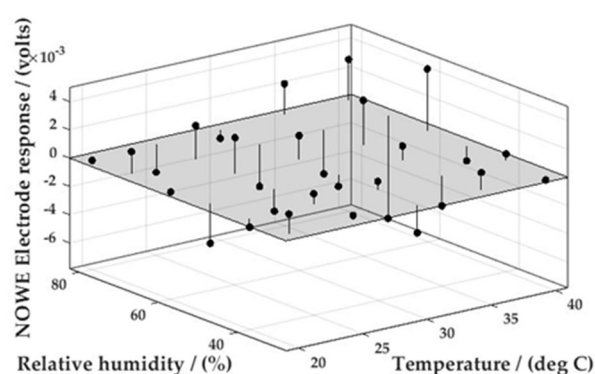

Figure S7. Nitric oxide working electrode residuals plot for Figure S6.

Table S1. Coefficients for Figure S4.

|       |                         |                                                      |
|-------|-------------------------|------------------------------------------------------|
| P00 = | 0.2386                  | (-0.08908, 0.388)                                    |
| P10 = | 0.0010025               | (-0.01234, 0.01439)                                  |
| P01 = |                         | (-0.001014, 0.00592)                                 |
| P20 = | 0.002453                | (-0.0005005, 0.0003649)                              |
| P11 = | $-6.782 \times 10^{-5}$ | ( $-3.976 \times 10^{-5}$ , $0.0001705$ )            |
| P02 = | $6.537 \times 10^{-5}$  | ( $-8.907 \times 10^{-5}$ , $1.746 \times 10^{-5}$ ) |
| P30 = | $-3.581 \times 10^{-5}$ | ( $-3.122 \times 10^{-6}$ , $6.324 \times 10^{-6}$ ) |
| P21 = | $1.601 \times 10^{-6}$  | ( $-1.91 \times 10^{-6}$ , $8.949 \times 10^{-7}$ )  |
| P12 = | $-5.057 \times 10^{-7}$ | ( $-1.044 \times 10^{-6}$ , $9.203 \times 10^{-6}$ ) |
| P03 = | $-4.76 \times 10^{-7}$  | ( $-1.423 \times 10^{-7}$ , $4.674 \times 10^{-7}$ ) |

Table S2. Coefficients for Figure S6.

|       |                         |                                                      |
|-------|-------------------------|------------------------------------------------------|
| P00 = | 0.2348                  | (0.07281, 0.3967)                                    |
| P10 = | 23B0.001371             | (-0.01311, 0.01585)                                  |
| P01 = | 0.002362                | (-0.001395, 0.006119)                                |
| P20 = | $-8.706 \times 10^{-5}$ | (-0.0005559, 0.0003818)                              |
| P11 = | $7.532 \times 10^{-5}$  | ( $-3.86 \times 10^{-5}$ , $0.0001892$ )             |
| P02 = | $-4.378 \times 10^{-5}$ | (-0.0001015, $1.39 \times 10^{-5}$ )                 |
| P30 = | $2.626 \times 10^{-6}$  | ( $-2.492 \times 10^{-5}$ , $7.74 \times 10^{-6}$ )  |
| P21 = | $-1.312 \times 10^{-7}$ | ( $-2.832 \times 10^{-6}$ , $2.075 \times 10^{-7}$ ) |
| P12 = | $-2.743 \times 10^{-7}$ | ( $-8.898 \times 10^{-7}$ , $3.412 \times 10^{-7}$ ) |
| P03 = | $2.106 \times 10^{-7}$  | ( $-1.197 \times 10^{-7}$ , $5.41 \times 10^{-7}$ )  |

**Table S3.** Coefficients for Figure 8a.

|       |                                 |                                                         |
|-------|---------------------------------|---------------------------------------------------------|
| P00 = | <b>-0.003784</b>                | (-0.1039, 0.09635)                                      |
| P10 = | <b>0.0003459</b>                | (-0.008609, 0.009301)                                   |
| P01 = | <b>-9.039 × 10<sup>-5</sup></b> | (-0.002413, 0.002232)                                   |
| P20 = | <b>-1.924 × 10<sup>-5</sup></b> | (-0.0003091, 0.0002706)                                 |
| P11 = | <b>9.943 × 10<sup>-6</sup></b>  | (-6.049 × 10 <sup>-5</sup> , 8.038 × 10 <sup>-5</sup> ) |
| P02 = | <b>-7.973 × 10<sup>-6</sup></b> | (-4.366 × 10 <sup>-5</sup> , 2.771 × 10 <sup>-5</sup> ) |
| P30 = | <b>1.024 × 10<sup>-6</sup></b>  | (-2.14 × 10 <sup>-6</sup> , 4.189 × 10 <sup>-6</sup> )  |
| P21 = | <b>-8.046 × 10<sup>-7</sup></b> | (-1.744 × 10 <sup>-6</sup> , 1.349 × 10 <sup>-7</sup> ) |
| P12 = | <b>2.017 × 10<sup>-7</sup></b>  | (-1.788 × 10 <sup>-7</sup> , 5.823 × 10 <sup>-7</sup> ) |
| P03 = | <b>4.804 × 10<sup>-8</sup></b>  | (-1.562 × 10 <sup>-7</sup> , 2.523 × 10 <sup>-7</sup> ) |

**Table S4.** Coefficients for Figure 9a.

|       |                  |                              |
|-------|------------------|------------------------------|
| P00 = | 2696             | <b>(303.3, 5636)</b>         |
| P10 = | -3.785           | <b>(-242.2, 234.6)</b>       |
| P01 = | -37.56           | <b>(-99.41, 24.29)</b>       |
| P20 = | 1.838            | <b>(-5.88, 9.556)</b>        |
| P11 = | <b>-2.749</b>    | <b>(-4.642, -0.8735)</b>     |
| P02 = | <b>1.142</b>     | <b>(0.1922, 2.092)</b>       |
| P30 = | <b>-0.03087</b>  | <b>(-0.1151, 0.05338)</b>    |
| P21 = | <b>0.02883</b>   | <b>(0.003811, 0.05384)</b>   |
| P12 = | <b>0.007405</b>  | <b>(-0.002728, 0.01754)</b>  |
| P03 = | <b>-0.006482</b> | <b>(-0.01192, -0.001044)</b> |

**Table S5.** Coefficients for Figure 9b.

|       |                 |                                        |
|-------|-----------------|----------------------------------------|
| P00 = | 34.4            | (-106.2, 175)                          |
| P10 = | 1.271           | (-1.991, 4.532)                        |
| P01 = | -4.532          | (-17.11, 8.042)                        |
| P20 = | -0.0144         | (-0.0645, 0.0357)                      |
| P11 = | -0.001114       | (-0.1, 0.09778)                        |
| P02 = | 0.1303          | (-0.2767, 0.5373)                      |
| P30 = | 0.0001344       | (-0.0001524, 0.0004211)                |
| P21 = | -0.0005955      | (-0.00113, -6.114 × 10 <sup>-5</sup> ) |
| P12 = | 0.001585        | (0.0002659, 0.002904)                  |
| P03 = | <b>-0.00273</b> | <b>(-0.007173, 0.001713)</b>           |
